## 1 **Ligand-independent modulation of GIPR signaling by splice variants**

2 Kaini Hang<sup>1,2,3,4,†</sup>, Lijun Shao<sup>2,3,†</sup>, Qingtong Zhou<sup>5</sup>, Fenghui Zhao<sup>6</sup>, Antao Dai<sup>6</sup>,  
3 Xiaoqing Cai<sup>6</sup>, Raymond C. Stevens<sup>1,2</sup>, Dehua Yang<sup>3,6,7,8,\*</sup>, Ming-Wei Wang<sup>2,3,5,6,7,8,\*</sup>

4 <sup>1</sup>iHuman Institute, ShanghaiTech University, Shanghai 201210, China.

5 <sup>2</sup>School of Life Science and Technology, ShanghaiTech University, Shanghai 201210,  
6 China

7 <sup>3</sup>University of Chinese Academy of Sciences, Beijing 100049, China.

8 <sup>4</sup>CAS Center for Excellence in Molecular Cell Science, Shanghai Institute of  
9 Biochemistry and Cell Biology, Shanghai 200031, China.

10 <sup>5</sup>Department of Pharmacology, School of Basic Medical Sciences, Fudan University,  
11 Shanghai 200032, China.

12 <sup>6</sup>The National Center for Drug Screening, Shanghai Institute of Materia Medica,  
13 Chinese Academy of Sciences, Shanghai 201203, China.

14 <sup>7</sup>The CAS Key Laboratory of Receptor Research, Shanghai Institute of Materia Medica,  
15 Chinese Academy of Sciences, Shanghai 201203, China.

16 <sup>8</sup>Research Center for Deepsea Bioresources, Sanya, Hainan 572025, China.

17 †These authors contributed equally to this work.

18 \*Corresponding author. Email: [dhyang@simm.ac.cn](mailto:dhyang@simm.ac.cn) (D.Y.); [mwwang@simm.ac.cn](mailto:mwwang@simm.ac.cn)  
19 (M.-W.W.)

### 20 **Abstract**

21 Glucose-dependent insulintropic polypeptide receptor (GIPR) is a potential drug target  
22 for metabolic disorders. It works with glucagon-like peptide-1 receptor (GLP-1R) and  
23 glucagon receptor (GCGR) in humans to maintain glucose homeostasis. Unlike the  
24 other two receptors, GIPR has at least 7 reported (EMBL-EBI, 2022; NCBI, 2022a,  
25 2022b) splice variants (SVs) with previously undefined functions. To explore their roles  
26 in endogenous peptide mediated GIPR signaling, we investigated the outcome of co-  
27 expressing each of the four SVs in question with GIPR in terms of ligand binding,  
28 cAMP accumulation, G<sub>s</sub> activation, β-arrestin recruitment and cell surface localization.  
29 The effects of these SVs on intracellular cAMP responses modulated by receptor

30 activity-modifying proteins (RAMPs) were also studied. It was found that while SVs  
31 of GIPR neither bound to the hormone nor affected its signal transduction *per se*, they  
32 differentially regulated GIPR-mediated cAMP and  $\beta$ -arrestin responses. Specifically,  
33 SV1 and SV4 were preferable to  $G_s$  signaling, SV3 was biased towards  $\beta$ -arrestin  
34 recruitment, whereas SV2 was inactive on both pathways. In the presence of RAMPs,  
35 only SV1 and SV4 synergized the repressive action of RAMP3 on GIP-elicited cAMP  
36 production. The results suggest a new form of signal bias that is constitutive and ligand-  
37 independent, thereby expanding our knowledge of biased signaling beyond  
38 pharmacological manipulation (*i.e.*, ligand specific) as well as constitutive and ligand-  
39 dependent (*e.g.*, SV1 of the growth hormone-releasing hormone receptor).

## 40 **Introduction**

41 G protein-coupled receptors (GPCRs) represent the largest family of membrane  
42 proteins that are universally expressed in human tissues (Pavlos & Friedman, 2017).  
43 They can recognize a diverse range of extracellular ligands and transduce signals to  
44 intracellular coupling partners, thereby governing crucial physiological functions  
45 (Strange, 2008). GPCR-mediated signaling and pharmacological activities could be  
46 profoundly affected by alternative splicing, leading to functional diversity (Furness,  
47 Wootten, Christopoulos, & Sexton, 2012; Marti-Solano et al., 2020).

48 Splice variants (SVs) have been observed in many GPCRs, in which sequence  
49 variations may include N terminus truncation or/and substitution, C terminus truncation  
50 or/and substitution, intracellular/extracellular loop differences, severe truncation  
51 leading to variants with less than 7 transmembrane domains (TMDs) or soluble variants  
52 (Markovic & Challiss, 2009). In general, N terminus variations impair ligand binding  
53 properties, such as corticotropin releasing hormone receptor 1 (CRH1R) and 2 (CRHR2)  
54 (Evans & Seasholtz, 2009), calcitonin receptor (CTR) (Nag, Sultana, Kato, & Hirose,  
55 2007) and parathyroid hormone 1 receptor (PTH1R) (Joun et al., 1997), while C  
56 terminus variations show altered signaling or protein interactions, such as metabotropic  
57 glutamate receptors (mGluRs) (Cai, Schools, & Kimelberg, 2000),  $\mu$ -opioid receptor  
58 (MOR) (Lu et al., 2015) and 5-hydroxytryptamine (5-HT) receptors (Coupar, Desmond,  
59 & Irving, 2007). Intracellular loop (ICL) differences affect G protein coupling

60 preference and extracellular loop (ECL) differences alter ligand specificity and binding  
61 kinetics, as illustrated by pituitary adenylate cyclase-activating polypeptide (PACAP)  
62 type 1 receptor (PAC1R) (McCulloch et al., 2001) and D3 dopamine receptor (D3R)  
63 (Karpa, Lin, Kabbani, & Levenson, 2000; Richtand, 2006), respectively. Variants with  
64 less than 7 TMDs caused by severe N terminus truncation exhibit negative effect on  
65 wild-type (WT) receptor signaling (Markovic & Challiss, 2009).

66 Glucose-dependent insulintropic polypeptide receptor (GIPR) belongs to class B1  
67 subfamily of GPCRs and is present in pancreatic cells, adipose tissues and osteoblasts.  
68 Upon GIP stimulation, it regulates insulin secretion, fat accumulation and bone  
69 formation by increasing intracellular adenosine 3,5-cyclic monophosphate (cAMP)  
70 levels (Campbell, 2021; Yabe & Seino, 2011; Yue & Lam, 2019). GIPR is reported to  
71 have a truncated SV showing a dominant negative effect on the translocation of WT  
72 GIPR from the endoplasmic reticulum (ER) to the cell surface, leading to a decreased  
73 activity (Harada et al., 2008). However, the functionalities of GIPR SVs remain to be  
74 defined.

75 In this study, we constructed and expressed four representative GIPR SVs to  
76 elaborate their biological properties on GIPR-mediated cAMP accumulation and  $\beta$ -  
77 arrestin recruitment. They were selected based on expression levels and splicing modes:  
78 SV1, SV2, SV3 and SV4 with residue lengths of 419, 430, 405 and 265, respectively  
79 (Figure 1). SV1 has a truncated C terminus and a 20 amino acid substitution. SV2 lacks  
80 the sequence of residues 58-93 at the N terminus. SV3 has a replaced N terminus of  
81 residues 1-93. SV4 only has 3 TMDs.

## 82 **Results**

### 83 **Splice variants neither bind nor affect GIP-induced cAMP response**

84 We first expressed GIPR and four SVs separately in HEK293T cells to investigate their  
85 ability to bind GIP<sub>1-42</sub> and elicit cAMP accumulation and  $\beta$ -arrestin recruitment. Figure  
86 2 shows that none of the SVs displayed any ligand-binding and signaling properties,  
87 whereas the WT receptor was highly active in each parameter analyzed.

### 88 **Splice variants differentially modulate GIPR-mediated signaling**

89 Since SVs are usually express in cells and tissues where GIPR are present (GTEx, 2022;

90 Harada et al., 2008), we co-transfected GIPR with each SV in order to study if they  
91 influence the signaling profile of the WT receptor. While the binding affinity of GIP<sub>1-</sub>  
92 <sub>42</sub> to the cognate receptor were significantly reduced by 0.44, 0.54, 0.50 and 0.74 folds  
93 for SV1, SV2, SV3 and SV4, respectively (Figure 3A and Table 1), cAMP and  $\beta$ -  
94 arrestin responses at GIPR were differentially and negatively modulated. Both SV1 and  
95 SV4 decreased cAMP signaling but the effect of SV4 was nearly 5-fold stronger than  
96 that of SV1, SV2 and SV3 were inactive (Figure 3B and Table 1). Although SV1, SV3  
97 and SV4 decreased the  $E_{max}$  values of  $\beta$ -arrestin 2 recruitment by 0.59, 0.49 and 0.42-  
98 folds, respectively, and SV2 remained inactive (Figure 3D and Table 1), none of them  
99 influenced on  $\beta$ -arrestin 1 recruitment (Figure 3C).

#### 100 **GIPR and splice variants are co-localized on the membrane**

101 GIPR and SVs could be localized either on the membrane or the cytoplasm of  
102 transfected HEK293T cells (Figure 4A and 4B). Figure 4C illustrates that GIPR, SV1  
103 and SV4 were co-expressed mostly on the cell surface, whereas SV2 and SV3 only  
104 exhibited a partial membrane co-localization. Upon co-transfection with GIPR, most of  
105 SV3 were translocated to the membrane (3<sup>rd</sup> panel of Figure 4C), but SV2 remained in  
106 the cytoplasm along with redistributed GIPR (2<sup>nd</sup> panel of Figure 4C), consistent with  
107 the silent role of SV2 observed.

#### 108 **Synergistic effect exerted by splice variants and RAMP3**

109 Receptor activity-modifying protein 3 (RAMP3) was reported to reduce GIP<sub>1-42</sub>  
110 induced cAMP accumulation at GIPR as opposed to RAMPs 1 and 2 that showed no  
111 effect (Harris, Mackie, Pawlak, Carvalho, & Ladds, 2021; Shao et al., 2021). After co-  
112 expression of individual SVs with GIPR and each RAMP, no alteration was noted with  
113 RAMP1 and RAMP2 (Figure 5A and 5B), but the suppression of GIPR-mediated  
114 cAMP production by RAMP3 was moderately augmented by SV1 and SV4 (with  $EC_{50}$   
115 increased by 0.54 and 0.96-fold, respectively) (Figure 5C and Table 2).

#### 116 **SV1 and SV4 are repressive on G<sub>s</sub> activation**

117 We also studied the effect of SVs on G<sub>s</sub> protein coupling by GIPR. G<sub>s</sub> activation was  
118 assessed using a split luciferase NanoBiT G protein sensor. Individually expressing SVs  
119 showed no ability to active G<sub>s</sub> (Figure 6A), consistent with their lack of cAMP signaling

120 (Figure 2B). SV1 and SV4 markedly impaired  $G_s$  coupling with 4.89- and 2.68-fold  
121 increased  $EC_{50}$  values, respectively (Figure 6B and Table 1). Although the P values of  
122  $pEC_{50}$  for SV1 and SV4 were greater than 0.05 probably due to inherent assay variations,  
123 the difference between their  $EC_{50}$  and that of GIPR alone was statistically significant  
124 (Figure 6C and D), thus in line with their repressive action on cAMP accumulation  
125 (Figure 3B).

### 126 **Diminished interaction between splice variants and signaling partners**

127 As shown in Figure 7A-C, the helix 8 (H8) of SV1 adopted a distinct conformation  
128 from that of GIPR during molecular dynamics (MD) simulations, bent upwards and  
129 moved away from  $G\beta$ , thereby resulting in a reduced receptor- $G\beta$  interface area. Of  
130 note, the specific residue in GIPR H8 (such as R405) stabilized the  $G\beta$  binding, which  
131 was absent in SV1, consistent with its role in  $G_s$ -mediated signaling. Compared to  
132 GIPR, obvious differences in peptide-binding and  $\beta$ -arrestin 1 interface were observed  
133 for SV3 (Figure 7D-F). By replacing the GIPR extracellular domain (ECD) with a  
134 smaller domain (61 fewer residues), SV3 reorganized its extracellular half including  
135 ECL1 to accommodate peptide binding with a smaller peptide-receptor interface (from  
136  $3,280 \text{ \AA}^2$  in the last 500 ns MD simulation of GIPR to  $2,826 \text{ \AA}^2$  in that of SV1). As far  
137 as the intracellular half is concerned,  $\beta$ -arrestin 1 inserted deeper to the SV3 core  
138 compared with that of GIPR (Figure 7E). These different structural and dynamics  
139 features between SV3 and GIPR highlight their distinct signaling properties.

### 140 **Discussion**

141 GIP, glucagon-like peptide-1 (GLP-1) and glucagon (GCG) together play a pivotal role  
142 in glucose homeostasis mediated via their respective receptors (Cho, Merchant, &  
143 Kieffer, 2012; Sekar, Singh, Arokiaraj, & Chow, 2016). GCG increases the release of  
144 glucose, while GIP and GLP-1R work synergistically to cause postprandial insulin  
145 secretion, regulate glucagon secretion, stimulate  $\beta$  cell proliferation and protect it from  
146 apoptosis (Alexiadou, Anyiam, & Tan, 2019; Estall & Drucker, 2006; Hansotia &  
147 Drucker, 2005; Seino, Fukushima, & Yabe, 2010; Skow, Bergmann, & Knop, 2016).  
148 Of note is that GIP promotes the release of both insulin and glucagon (Gasbjerg et al.,

149 2018) thereby modulating the action of GLP-1 and GCG on sugar metabolism, probably  
150 involving some SVs of GIPR.

151 A common feature of the SVs examined is that they neither bind the native ligand,  
152 GIP<sub>1-42</sub>, nor elicit signal transduction. When co-expressed with WT GIPR, all of them  
153 reduced peptide binding in a similar manner while displaying distinct signaling profiles  
154 (Figure 8). Both SV1 and SV4 decreased GIPR-mediated cAMP and  $\beta$ -arrestin 2  
155 responses; SV3 selectively suppressed  $\beta$ -arrestin 2 recruitment, and SV2 had no effect  
156 on the two signaling events, but diminished GIPR presence in the membrane. While  
157 SV1 (SV4 to less extent) may have the preference for activating the G<sub>s</sub> pathway, SV3  
158 obviously is biased towards  $\beta$ -arrestin 2 recruitment.

159 Consistent with previous findings showing that SVs are capable of altering  
160 signaling profiles compared to WT receptors (Kochman, 2014; Maggio et al., 2016),  
161 our data suggest a constitutive biased mechanism different from signal bias caused by  
162 various ligands. For example, SVs of the C-X-C chemokine receptor 3 (CXCR3) could  
163 activate different signaling pathways through biased agonism (Berchiche & Sakmar,  
164 2016), and SV1 of the growth hormone-releasing hormone receptor (GHRHR)  
165 preferentially transduces signals via  $\beta$ -arrestins while GHRHR predominantly activates  
166 G<sub>s</sub> proteins (Cong et al., 2021). However, unlike other GPCR SVs, that of GIPR are  
167 incapacitated in terms of ligand-binding and signal transduction *per se*, but negatively  
168 affect that of the WT receptor in a ligand-independent and signaling biased manner.

169 Bidirectional regulation of carbohydrate levels by GIP<sub>1-42</sub> is essential to the  
170 maintenance of glucose homeostasis, although this hinders the development of  
171 therapeutic agents targeting GIPR (Killion et al., 2018). It seems that such a unique  
172 modulation of gut hormone actions is finely tuned by SVs with differentiated  
173 functionalities: the repression of cAMP response imposed by RAMP3 could be  
174 strengthened by SV1 and SV4, whereas  $\beta$ -arrestin 2 signaling is solely modified by  
175 SV3. Unlike the other three SVs, SV2 appears as a sequester that redistributes the  
176 membrane GIPR to the cytoplasm, evidenced by immunofluorescence staining when

177 both WT GIPR and SV2 are co-expressed. Whether this constitutes a shutdown  
178 mechanism for GIPR function remains to be explored.

179 The roles of SVs in GIPR functioning are unique not only because they are of  
180 repressive nature but also due to their synergistic actions with RAMP3 that itself is a  
181 negative regulator of most members of the glucagon receptor subfamily of class B1  
182 GPCRs (Shao et al., 2021). It remains elusive if the above described phenomenon  
183 constitutes a “doubly insured” mechanism for signal modulation in order to fine tune  
184 the action of GIP<sub>1-42</sub>. Clearly both in-depth structural and biochemical studies are  
185 required to solve the puzzle.

186

187 **Materials and Methods**

188 **Key resource table**

| <b>Reagent type<br/>(species) or<br/>resource</b> | <b>Designation</b>                         | <b>Source or reference</b>        | <b>Identifier</b>     | <b>Additional<br/>information</b> |
|---------------------------------------------------|--------------------------------------------|-----------------------------------|-----------------------|-----------------------------------|
| Transcript ID                                     | WT GIPR                                    | ENSEMBL                           | ENST00000590918.6     |                                   |
| Transcript ID                                     | Splice variant 1                           | ENSEMBL                           | ENST00000263281.7     |                                   |
| Transcript ID                                     | Splice variant 2                           | ENSEMBL                           | ENST00000304207.12    |                                   |
| Transcript ID                                     | Splice variant 3                           | ENSEMBL                           | ENST00000652180.1     |                                   |
| Transcript ID                                     | Splice variant 4                           | ENSEMBL                           | ENST00000585889.1     |                                   |
| Cell line ( <i>Homo sapiens</i> )                 | HEK293T                                    | ATCC                              | Cat. No.:<br>CRL-3216 |                                   |
| Cell line<br>(hamster)                            | CHO-K1                                     | ATCC                              | Cat. No.:<br>CCL-61   |                                   |
| Recombinant<br>DNA reagent                        | pcDNA3.1-GIPR (WT<br>and splice variants)  | This paper                        | N/A                   |                                   |
| Recombinant<br>DNA reagent                        | pcDNA3.1-GIPR<br>(WT)-HA                   | doi:<br>10.1016/j.bcp.2020.114001 | N/A                   |                                   |
| Recombinant<br>DNA reagent                        | pcDNA3.1-GIPR<br>(splice variants) -FLAG   | This paper                        | N/A                   |                                   |
| Recombinant<br>DNA reagent                        | pcDNA3.1-GIPR (WT<br>and splice variants)- | This paper                        | N/A                   |                                   |



|                              |                                           |                                    |                           |  |
|------------------------------|-------------------------------------------|------------------------------------|---------------------------|--|
|                              | Rluc8 (Renilla luciferase 8)              |                                    |                           |  |
| Recombinant DNA reagent      | Venus- $\beta$ -arrestins 1 and 2         | doi:<br>10.1016/j.bcp.2020.14001   | N/A                       |  |
| Recombinant DNA reagent      | pcDNA3-RAMP3                              | doi:<br>10.1016/j.apsb.2021.07.028 | N/A                       |  |
| Peptide, recombinant protein | GIP <sub>1-42</sub>                       | GenScript                          | N/A                       |  |
| Chemical compound, drug      | Bovine serum albumin (BSA)                | ABCONE                             | Cat. No.:<br>A23088-100G  |  |
| Chemical compound, drug      | 3-Isobutylene-1-methylxanthine (IBMX)     | ABCONE                             | Cat. No.:<br>I72182-250MG |  |
| Chemical compound, drug      | Fetal bovine serum (FBS)                  | Gibco                              | Cat. No.:<br>10099-141    |  |
| Chemical compound, drug      | Dulbecco's modified Eagle's medium (DMEM) | Gibco                              | Cat. No.:<br>12430-054    |  |
| Chemical compound, drug      | Ham's F-12 nutrient mix (F12)             | Gibco                              | Cat. No.:<br>C11765500    |  |
| Chemical compound, drug      | Hanks' Balanced Salt solution (HBSS)      | Gibco                              | Cat. No.:<br>C14175500    |  |
| Chemical compound, drug      | HEPES                                     | Gibco                              | Cat. No.:<br>15630-080    |  |

|                         |                                                           |                                       |                              |                                                                                                               |
|-------------------------|-----------------------------------------------------------|---------------------------------------|------------------------------|---------------------------------------------------------------------------------------------------------------|
| Chemical compound, drug | Sodium pyruvate                                           | Gibco                                 | Cat. No.:<br>11360-0'70      |                                                                                                               |
| Chemical compound, drug | Lipofectamine 2000 transfection reagent                   | Invitrogen                            | Cat. No.:<br>11668-019       |                                                                                                               |
| Chemical compound, drug | <sup>125</sup> I-GIP                                      | PerkinElmer                           | Cat. No.:<br>NEX40201<br>0UC |                                                                                                               |
| Chemical compound, drug | Coelenterazine H                                          | Yeasen Biotech                        | Cat. No.:<br>40906ES02       |                                                                                                               |
| Antibody                | Anti-FLAG primary antibody                                | Sigma-Aldrich                         | Cat. No.:<br>F3165           |                                                                                                               |
| Antibody                | Anti-HA primary antibody                                  | Cell Signaling Technology             | Cat. No.:<br>3724S           |                                                                                                               |
| Antibody                | Anti-mouse Alexa Fluor 647 conjugated secondary antibody  | Invitrogen                            | Cat. No.:<br>A31571          |                                                                                                               |
| Antibody                | Anti-rabbit Alexa Fluor 488 conjugated secondary antibody | Invitrogen                            | Cat. No.:<br>A21206          |                                                                                                               |
| Commercial assay, kit   | LANCE Ultra cAMP kit                                      | PerkinElmer                           | Cat. No.:<br>2675984         |                                                                                                               |
| Software, algorithm     | GraphPad Prism v8.4                                       | GraphPad Software                     | N/A                          | <a href="https://www.graphpad.com/">https://www.graphpad.com/</a>                                             |
| Software, algorithm     | FreeSASA                                                  | doi:<br>10.12688/f1000research.7931.1 | N/A                          | <a href="http://freesasa.github.io/">http://freesasa.github.io/</a>                                           |
| Software, algorithm     | Gromacs 2020.1                                            | doi:<br>10.1016/j.softx.2015.06.001   | N/A                          | <a href="https://manual.gromacs.org/2020.1/download.html">https://manual.gromacs.org/2020.1/download.html</a> |

|                     |                                           |                                   |     |                                                                                                                                               |
|---------------------|-------------------------------------------|-----------------------------------|-----|-----------------------------------------------------------------------------------------------------------------------------------------------|
| Software, algorithm | Protein Preparation Wizard                | Schrödinger                       | N/A | <a href="https://www.schrodinger.com/products/protein-preparation-wizard">https://www.schrodinger.com/products/protein-preparation-wizard</a> |
| Software, algorithm | CHARMM-GUI Membrane Builder v3.6          | doi: 10.1002/jcc.23702            | N/A | <a href="https://charmm-gui.org/">https://charmm-gui.org/</a>                                                                                 |
| Software, algorithm | CHARMM36-CAMP                             | doi: 10.1021/ct200328p            | N/A |                                                                                                                                               |
| Software, algorithm | LINCS algorithm                           | doi: 10.1021/ct700200b            | N/A |                                                                                                                                               |
| Software, algorithm | Semi-isotropic Parrinello-Rahman barostat | doi: 10.1016/0022-3093(93)90111-A | N/A |                                                                                                                                               |

## 189 **Cell culture**

190 HEK293T cells were maintained in DMEM (Gibco) supplemented with 10% FBS  
191 (Gibco) and 100 mM sodium pyruvate (Gibco). CHO-K1 cells were maintained in F12  
192 (Gibco) supplemented with 10% FBS. All cells were incubated in a humidified  
193 environment at 37 °C in 5% CO<sub>2</sub>.

## 194 **Construct**

195 cDNAs were inserted into pcDNA3.1 vector by one-step cloning. Addition of FLAG-  
196 and HA-tags to WT GIPR or SVs was carried out by site-directed mutagenesis. WT  
197 GIPR or SVs were cloned to the backbone of Rluc8 at the C terminus. All constructs  
198 were confirmed by DNA sequencing (GENEWIZ, Suzhou, China). To optimizing the  
199 co-transfection assays, three GIPR vs. SV ratios (1:1, 1:3 and 1:6) were tried. Since the  
200 impact of 1:1 on GIPR activity was hard to observe and that of 1:3 and 1.6 was similar,  
201 we selected 1:3 for the entire study.

## 202 **cAMP accumulation assay**

203 GIP<sub>1-42</sub> stimulated cAMP accumulation was measured by a LANCE Ultra cAMP kit  
204 (PerkinElmer). Cells were seeded onto 6-well cell culture plates and transiently  
205 transfected with 4 µg plasmid using Lipofectamine 2000 transfection reagent

206 (Invitrogen). After 24 h culture, the transfected cells were seeded onto 384-well  
207 microtiter plates at a density of 3,000 cells per well in HBSS (Gibco) supplemented  
208 with 5 mM HEPES (Gibco), 0.1% (w/v) bovine serum albumin (BSA) and 0.5 mM  
209 IBMX (Sigma-Aldrich). The cells were stimulated with different concentrations of  
210 GIP<sub>1-42</sub> for 40 min at room temperature (RT). Eu and Ulight were then diluted by cAMP  
211 detection buffer and added to the plates separately to terminate the reaction. Plates were  
212 incubated at RT for 40 min and the fluorescence intensity measured at 620 nm and 650  
213 nm by an EnVision multilabel plate reader (PerkinElmer).

#### 214 **Whole-cell binding assay**

215 CHO-K1 cells were seeded at a density of 30,000 cells/well in Isoplate-96 plates  
216 (PerkinElmer). The WT GIPR or SVs were transiently transfected using Lipofectamine  
217 2000 transfection reagent. Twenty-four hours after transfection, cells were washed  
218 twice, and incubated with blocking buffer (F12 supplemented with 33 mM HEPES and  
219 0.1% BSA, pH 7.4) for 2 h at 37°C. For homogeneous binding, cells were incubated in  
220 binding buffer with a constant concentration of <sup>125</sup>I-GIP (40 pM, PerkinElmer) and  
221 increasing concentrations of unlabeled GIP<sub>1-42</sub> (3.57 pM to 1 μM) at RT for 3 h.  
222 Following incubation, cells were washed three times with ice-cold PBS and lysed by  
223 addition of 50 μL lysis buffer (PBS supplemented with 20 mM Tris-HCl, 1% Triton X-  
224 100, pH 7.4). Fifty μL of scintillation cocktail (OptiPhase SuperMix, PerkinElmer) was  
225 added and the plates were subsequently counted for radioactivity (counts per minute,  
226 CPM) in a scintillation counter (MicroBeta2 Plate Counter, PerkinElmer).

#### 227 **β-arrestin 1/2 recruitment**

228 HEK293T cells (3.5×10<sup>6</sup> cells/mL) were grown for 24 h before transfection with 4 μg  
229 plasmid containing a GIPR/SV-Rluc8:Venus-β-arrestin1/2 at ratio of 1:9, or a GIPR-  
230 Rluc8:SV:Venus-β-arrestin1/2 at a ratio of 1:3:9. Transiently transfected cells were  
231 then seeded onto poly-D-lysine coated 96-well culture plates (50,000 cells/well) in  
232 DMEM with 10% FBS. Cells were grown overnight before incubation in assay buffer  
233 (HBSS supplemented with 10 mM HEPES and 0.1% BSA, pH 7.4) for 30 min at 37°C.  
234 Coelentrazine-h (Yeasen Biotech) was added to a final concentration of 5 μM for 5 min  
235 before bioluminescence resonance energy transfer (BRET) readings were made using

236 an EnVision plate reader. BRET baseline measurements were collected for 15 cycles  
237 prior to ligand addition. Following peptide addition, BRET was measured for 55 cycles.  
238 The BRET signal (ratio of 535 nm over 470 nm emission) was corrected to the baseline  
239 and then vehicle-treated condition to determine ligand-induced changes in BRET  
240 response. Concentration-response values were obtained from the area-under-the-curve  
241 (AUC) of the responses elicited by GIP<sub>1-42</sub>.

#### 242 **Immunofluorescence staining**

243 HEK293T cells were seeded in 6-well plates and transfected with 4 µg plasmid  
244 containing GIPR-HA or/and SV-FLAG. After 24 h, cells were collected and reseeded  
245 in 96-well plates until they reached 50%~70% confluence. Cells were washed with PBS  
246 before fixation with 4% paraformaldehyde for 15 min. Then they were washed three  
247 more times and blocked with 5% BSA plus 0.1% Triton X-100 for 1 h at RT. Rabbit  
248 anti-HA primary antibody (diluted 1:500) or/and mouse anti-FLAG primary antibody  
249 (diluted 1:300) were diluted with incubation buffer (PBS supplemented with 5% BSA)  
250 for 1 h followed by 3-time wash. Cells were reacted with 200 µL interaction buffer  
251 containing donkey anti-rabbit Alexa 488-conjugated secondary antibody or/and donkey  
252 anti-mouse Alexa 647-conjugated secondary antibody (diluted 1:1000) at RT for 1 h in  
253 the dark. After final washing, nuclei were stained with Hoechst 33258 for 5 min. Cells  
254 were imaged using a high-resolution microscope DeltaVision™ Ultra (GE Healthcare,  
255 Boston, USA).

#### 256 **G protein NanoBiT assay**

257 HEK293T cells ( $3.5 \times 10^6$  cells/mL) were grown for 24 h to reach 70% to 80%  
258 confluence. Then the cells were transiently transfected with GIPR, G $\alpha_s$ -LgBiT, G $\beta$ 1,  
259 and G $\gamma$ 2-SmBiT at a 2:1:5:5 mass ratio, or GIPR, SV, G $\alpha_s$ -LgBiT, G $\beta$ 1, and G $\gamma$ 2-  
260 SmBiT at a 2:6:1:5:5 mass ratio. Twenty-four hours after transfection, cells were seeded  
261 into poly-D-lysine coated 96-well culture plates at a density of 50,000 cells per well in  
262 DMEM with 10% FBS. Cells were grown overnight before incubation in HBSS buffer  
263 (pH 7.4) supplemented with 0.1% BSA and 10 mM HEPES for 30 mins at 37°C (no  
264 CO<sub>2</sub>). They were then reacted with coelenterazine H (5 µM) for 2 h at RT.  
265 Luminescence signals were measured using an EnVision plate reader at 15-s intervals

266 (25°C). Briefly, following the baseline reading for 3.5 min, GIP<sub>1-42</sub> was added, and the  
267 reading continued for 13.5 min. Data were corrected to baseline and vehicle-treated  
268 samples. The area-under-the-curve (AUC) across the time-course response curve was  
269 determined and normalized to the WT GIPR, which was set to 100%.

## 270 **Molecular dynamics simulation**

271 Molecular dynamic simulations were performed by Gromacs 2020.1. The homology  
272 models of SV1 and SV3 were generated using the cryo-EM structure of the full-length  
273 GIPR (PDB code: 7DTY) (Zhao et al., 2021) and the X-ray structure of the GIPR ECD  
274 (PDB code: 2QKH) (Parthier et al., 2007) as templates. All peptide–receptor–G<sub>s</sub>  
275 complexes were built based on the cryo-EM structure of the GIP–GIPR–G<sub>s</sub> complex  
276 (PDB code: 7DTY) (Zhao et al., 2021) and prepared by the Protein Preparation Wizard  
277 (Schrodinger 2017-4) with the Nb35 nanobody removed. To build the model of  
278 peptide–receptor– $\beta$ -arrestin 1 complex, the receptor in complex with both peptide and  
279 G<sub>s</sub> was aligned to the published  $\beta$ -arrestin 1–bound  $\beta_1$ AR structure (PDB code: 6TKO)  
280 (Lee et al., 2020). The receptor chain termini were capped with acetyl and methylamide.  
281 The residues G2 and C3 of G $\alpha_s$  were *N*-myristoylated and palmitoylated, respectively  
282 (Kato et al., 2019). All missing backbone and side chains were modeled using Prime  
283 (Schrodinger 2017-4) and the titratable residues were left in their dominant state at pH  
284 7.0. To build MD simulation systems, the complexes were embedded in a bilayer  
285 composed of 254~315 POPC lipids and solvated with 0.15 M NaCl in explicit TIP3P  
286 waters using CHARMM-GUI Membrane Builder v3.6 (Wu et al., 2014). The  
287 CHARMM36-CAMP force field (Guvench et al., 2011) was adopted for protein,  
288 peptides, lipids and salt ions. The Particle Mesh Ewald (PME) method was used to treat  
289 all electrostatic interactions beyond a cut-off of 12 Å and the bonds involving hydrogen  
290 atoms were constrained using LINCS algorithm (Hess, 2008). The complex system was  
291 first relaxed using the steepest descent energy minimization, followed by slow heating  
292 of the system to 310 K with restraints. The restraints were reduced gradually over 50  
293 ns. Finally, restrain-free production run was carried out for each simulation, with a time  
294 step of 2 fs in the NPT ensemble at 310 K and 1 bar using the Nose-Hoover thermostat  
295 and the semi-isotropic Parrinello-Rahman barostat (Aoki & Yonezawa, 1992),

296 respectively. The buried interface areas were calculated with FreeSASA using the  
297 Sharke-Rupley algorithm with a probe radius of 1.2 Å (Mitternacht, 2016).

### 298 **Statistical analysis**

299 Statistical analysis was performed using GraphPad Prism 8.4 (GraphPad Software). For  
300 signaling assays, data of individual experiments were normalized to the maximum  
301 responses in cells expressing only the WT GIPR. Non-linear curve fit was performed  
302 using a three-parameter logistic equation (log (agonist vs. response)). All data are  
303 presented as means ± SEM. Significant differences were determined by one-way  
304 ANOVA with Dunnett's test. For co-localization analysis, Pearson's correlation  
305 coefficients (r) were performed using the co-localization threshold plugin of ImageJ.  
306 Five separate Regions of Interest (ROI) were selected and means ± SEM were  
307 determined.

### 308 **References**

- 309 Alexiadou, K., Anyiam, O., & Tan, T. (2019). Cracking the combination: Gut hormones  
310 for the treatment of obesity and diabetes. *J Neuroendocrinol*, *31*(5), e12664.  
311 doi:10.1111/jne.12664
- 312 Aoki, K. M., & Yonezawa, F. (1992). Constant-pressure molecular-dynamics  
313 simulations of the crystal-smectic transition in systems of soft parallel  
314 spherocylinders. *Physical Review A*, *46*(10), 6541-6549.  
315 doi:10.1103/physreva.46.6541
- 316 Berchiche, Y. A., & Sakmar, T. P. (2016). CXC Chemokine Receptor 3 Alternative  
317 Splice Variants Selectively Activate Different Signaling Pathways. *Mol*  
318 *Pharmacol*, *90*(4), 483-495. doi:10.1124/mol.116.105502
- 319 Cai, Z., Schools, G. P., & Kimelberg, H. K. (2000). Metabotropic glutamate receptors  
320 in acutely isolated hippocampal astrocytes: developmental changes of mGluR5  
321 mRNA and functional expression. *Glia*, *29*(1), 70-80. doi:10.1002/(sici)1098-  
322 1136(20000101)29:1<70::aid-glia7>3.0.co;2-v
- 323 Campbell, J. E. (2021). Targeting the GIPR for obesity: To agonize or antagonize?  
324 Potential mechanisms. *Mol Metab*, *46*, 101139.  
325 doi:10.1016/j.molmet.2020.101139
- 326 Cho, Y. M., Merchant, C. E., & Kieffer, T. J. (2012). Targeting the glucagon receptor  
327 family for diabetes and obesity therapy. *Pharmacol Ther*, *135*(3), 247-278.  
328 doi:10.1016/j.pharmthera.2012.05.009
- 329 Cong, Z., Zhou, F., Zhang, C., Zou, X., Zhang, H., Wang, Y., Zhou Q., Cai X., Liu Q.,  
330 Li J., Shao L., Mao C., Wang X., Wu J., Xia T., Zhao L.-H., Jiang H., Zhang Y.,  
331 Xu H. E., Cheng X., Yang D., Wang, M.-W. (2021). Constitutive signal bias  
332 mediated by the human GHRHR splice variant 1. *Proc Natl Acad Sci U S A*,  
333 *118*(40). doi:10.1073/pnas.2106606118

- 334 Coupar, I. M., Desmond, P. V., & Irving, H. R. (2007). Human 5-HT(4) and 5-HT(7)  
335 receptor splice variants: are they important? *Curr Neuropharmacol*, 5(4), 224-  
336 231. doi:10.2174/157015907782793621
- 337 EMBL-EBI. (2022). Gene: GIPR ENSG00000010310 Structural variants. Ensembl  
338 release 105. Retrieved from  
339 [https://asia.ensembl.org/Homo\\_sapiens/Gene/StructuralVariation\\_Gene?db=co](https://asia.ensembl.org/Homo_sapiens/Gene/StructuralVariation_Gene?db=core;g=ENSG00000010310;r=19:45668221-45683722)  
340 [re;g=ENSG00000010310;r=19:45668221-45683722](https://asia.ensembl.org/Homo_sapiens/Gene/StructuralVariation_Gene?db=core;g=ENSG00000010310;r=19:45668221-45683722)
- 341 Estall, J. L., & Drucker, D. J. (2006). Glucagon and glucagon-like peptide receptors as  
342 drug targets. *Curr Pharm Des*, 12(14), 1731-1750.  
343 doi:10.2174/138161206776873671
- 344 Evans, R. T., & Seasholtz, A. F. (2009). Soluble corticotropin-releasing hormone  
345 receptor 2alpha splice variant is efficiently translated but not trafficked for  
346 secretion. *Endocrinology*, 150(9), 4191-4202. doi:10.1210/en.2009-0285
- 347 Furness, S. G., Wootten, D., Christopoulos, A., & Sexton, P. M. (2012). Consequences  
348 of splice variation on Secretin family G protein-coupled receptor function. *Br J*  
349 *Pharmacol*, 166(1), 98-109. doi:10.1111/j.1476-5381.2011.01571.x
- 350 Gasbjerg, L. S., Gabe, M. B. N., Hartmann, B., Christensen, M. B., Knop, F. K., Holst,  
351 J. J., & Rosenkilde, M. M. (2018). Glucose-dependent insulinotropic  
352 polypeptide (GIP) receptor antagonists as anti-diabetic agents. *Peptides*, 100,  
353 173-181. doi:10.1016/j.peptides.2017.11.021
- 354 GTEx. (2022). Isoform Expression of GIPR: ENSG00000010310.8 gastric inhibitory  
355 polypeptide receptor [Source:HGNC Symbol;Acc:HGNC:4271]. (dbGaP  
356 Accession phs000424.v8.p2). Retrieved from  
357 <https://gtexportal.org/home/gene/GIPR#gene-transcript-browser-block>
- 358 Guvench, O., Mallajosyula, S. S., Raman, E. P., Hatcher, E., Vanommeslaeghe, K.,  
359 Foster, T. J., Jamison F. W. 2nd, Mackerell, A. D., Jr. (2011). CHARMM  
360 additive all-atom force field for carbohydrate derivatives and its utility in  
361 polysaccharide and carbohydrate-protein modeling. *J Chem Theory Comput*,  
362 7(10), 3162-3180. doi:10.1021/ct200328p
- 363 Hansotia, T., & Drucker, D. J. (2005). GIP and GLP-1 as incretin hormones: lessons  
364 from single and double incretin receptor knockout mice. *Regul Pept*, 128(2),  
365 125-134. doi:10.1016/j.regpep.2004.07.019
- 366 Harada, N., Yamada, Y., Tsukiyama, K., Yamada, C., Nakamura, Y., Mukai, E.,  
367 Hamasaki A., Liu X., Toyoda K., Seino Y., Inagaki, N. (2008). A novel GIP  
368 receptor splice variant influences GIP sensitivity of pancreatic beta-cells in  
369 obese mice. *Am J Physiol Endocrinol Metab*, 294(1), E61-68.  
370 doi:10.1152/ajpendo.00358.2007
- 371 Harris, M., Mackie, D. I., Pawlak, J. B., Carvalho, S., & Ladds, G. (2021). RAMPs  
372 regulate signalling bias and internalisation of the GIPR.
- 373 Hess, B. (2008). P-LINCS: A Parallel Linear Constraint Solver for Molecular  
374 Simulation. *J Chem Theory Comput*, 4(1), 116-122. doi:10.1021/ct700200b
- 375 Joun, H., Lanske, B., Karperien, M., Qian, F., Defize, L., & Abou-Samra, A. (1997).  
376 Tissue-specific transcription start sites and alternative splicing of the  
377 parathyroid hormone (PTH)/PTH-related peptide (PTHrP) receptor gene: a new



- 378 PTH/PTHrP receptor splice variant that lacks the signal peptide. *Endocrinology*,  
379 *138*(4), 1742-1749. doi:10.1210/endo.138.4.5085
- 380 Karpa, K. D., Lin, R., Kabbani, N., & Levenson, R. (2000). The dopamine D3 receptor  
381 interacts with itself and the truncated D3 splice variant d3nf: D3-D3nf  
382 interaction causes mislocalization of D3 receptors. *Mol Pharmacol*, *58*(4), 677-  
383 683. doi:10.1124/mol.58.4.677
- 384 Kato, H. E., Zhang, Y., Hu, H., Suomivuori, C. M., Kadji, F. M. N., Aoki, J., Krishna  
385 Kumar K., Fonseca R., Hilger D., Huang W., Latorraca N. R., Inoue A., Dror R.  
386 O., Kobilka B. K., Skiniotis, G. (2019). Conformational transitions of a  
387 neurotensin receptor 1-Gi1 complex. *Nature*, *572*(7767), 80-85.  
388 doi:10.1038/s41586-019-1337-6
- 389 Killion, E. A., Wang, J., Yie, J., Shi, S. D., Bates, D., Min, X., Komorowski R., Hager  
390 T., Deng L., Atangan L., Lu S.-C, Kurzeja R. J. M, Sivits G., Lin J., Chen Q.,  
391 Wang Z., Thibault S. A., Abbott C. M., Meng T., Clavette B., Murawsky C. M.,  
392 Foltz I. N., Rottman J. B., Hale C., Véniant M. M., Lloyd, D. J. (2018). Anti-  
393 obesity effects of GIPR antagonists alone and in combination with GLP-1R  
394 agonists in preclinical models. *Sci Transl Med*, *10*(472).  
395 doi:10.1126/scitranslmed.aat3392
- 396 Kochman, K. (2014). Superfamily of G-protein coupled receptors (GPCRs)--  
397 extraordinary and outstanding success of evolution. *Postepy Hig Med Dosw*  
398 *(Online)*, *68*, 1225-1237. doi:10.5604/17322693.1127326
- 399 Lee, Y., Warne, T., Nehme, R., Pandey, S., Dwivedi-Agnihotri, H., Chaturvedi, M.,  
400 Edwards P. C., García-Nafria J., Leslie A. G. W., Shukla A. K., Tate, C. G.  
401 (2020). Molecular basis of beta-arrestin coupling to formoterol-bound beta1-  
402 adrenoceptor. *Nature*, *583*(7818), 862-866. doi:10.1038/s41586-020-2419-1
- 403 Lu, Z., Xu, J., Rossi, G. C., Majumdar, S., Pasternak, G. W., & Pan, Y. X. (2015).  
404 Mediation of opioid analgesia by a truncated 6-transmembrane GPCR. *J Clin*  
405 *Invest*, *125*(7), 2626-2630. doi:10.1172/JCI81070
- 406 Maggio, R., Fasciani, I., Rossi, M., Di Gregorio, J., Pietrantonio, I., Puca, V., Flati V.,  
407 Scarselli, M. (2016). Variants of G protein-coupled receptors: a reappraisal of  
408 their role in receptor regulation. *Biochem Soc Trans*, *44*(2), 589-594.  
409 doi:10.1042/BST20150239
- 410 Markovic, D., & Challiss, R. A. (2009). Alternative splicing of G protein-coupled  
411 receptors: physiology and pathophysiology. *Cell Mol Life Sci*, *66*(20), 3337-  
412 3352. doi:10.1007/s00018-009-0093-4
- 413 Marti-Solano, M., Crilly, S. E., Malinverni, D., Munk, C., Harris, M., Pearce, A., Quon  
414 T., Mackenzie A. E., Wang X., Peng J., Tobin A. B/, Ladds G., Milligan G.,  
415 Gloriam D. E., Puthenvedu M. A., Babu, M. M. (2020). Combinatorial  
416 expression of GPCR isoforms affects signalling and drug responses. *Nature*,  
417 *587*(7835), 650-656. doi:10.1038/s41586-020-2888-2
- 418 McCulloch, D. A., Lutz, E. M., Johnson, M. S., Robertson, D. N., MacKenzie, C. J.,  
419 Holland, P. J., & Mitchell, R. (2001). ADP-ribosylation factor-dependent  
420 phospholipase D activation by VPAC receptors and a PAC(1) receptor splice  
421 variant. *Mol Pharmacol*, *59*(6), 1523-1532. doi:10.1124/mol.59.6.1523

- 422 Mitternacht, S. (2016). FreeSASA: An open source C library for solvent accessible  
423 surface area calculations. *F1000Res*, 5, 189.  
424 doi:10.12688/f1000research.7931.1
- 425 Nag, K., Sultana, N., Kato, A., & Hirose, S. (2007). Headless splice variant acting as  
426 dominant negative calcitonin receptor. *Biochem Biophys Res Commun*, 362(4),  
427 1037-1043. doi:10.1016/j.bbrc.2007.08.107
- 428 NCBI. (2022a). Gastric inhibitory polypeptide receptor isoform X6 [Homo sapiens].  
429 v109.20211119. Retrieved from  
430 [https://www.ncbi.nlm.nih.gov/protein/XP\\_016882074.1](https://www.ncbi.nlm.nih.gov/protein/XP_016882074.1)
- 431 NCBI. (2022b). Gastric inhibitory polypeptide receptor isoform X9 [Homo sapiens].  
432 v109.20211119. Retrieved from  
433 [https://www.ncbi.nlm.nih.gov/protein/XP\\_011525018.1](https://www.ncbi.nlm.nih.gov/protein/XP_011525018.1)
- 434 Parthier, C., Kleinschmidt, M., Neumann, P., Rudolph, R., Manhart, S., Schlenzig, D.,  
435 Fanghänel J., Rahfeld J.-U., Demuth H.-U., Stubbs, M. T. (2007). Crystal  
436 structure of the incretin-bound extracellular domain of a G protein-coupled  
437 receptor. *Proc Natl Acad Sci U S A*, 104(35), 13942-13947.  
438 doi:10.1073/pnas.0706404104
- 439 Pavlos, N. J., & Friedman, P. A. (2017). GPCR Signaling and Trafficking: The Long  
440 and Short of It. *Trends Endocrinol Metab*, 28(3), 213-226.  
441 doi:10.1016/j.tem.2016.10.007
- 442 Richtand, N. M. (2006). Behavioral sensitization, alternative splicing, and d3 dopamine  
443 receptor-mediated inhibitory function. *Neuropsychopharmacology*, 31(11),  
444 2368-2375. doi:10.1038/sj.npp.1301163
- 445 Seino, Y., Fukushima, M., & Yabe, D. (2010). GIP and GLP-1, the two incretin  
446 hormones: Similarities and differences. *J Diabetes Investig*, 1(1-2), 8-23.  
447 doi:10.1111/j.2040-1124.2010.00022.x
- 448 Sekar, R., Singh, K., Arokiaraj, A. W., & Chow, B. K. (2016). Pharmacological Actions  
449 of Glucagon-Like Peptide-1, Gastric Inhibitory Polypeptide, and Glucagon. *Int*  
450 *Rev Cell Mol Biol*, 326, 279-341. doi:10.1016/bs.ircmb.2016.05.002
- 451 Shao, L., Chen, Y., Zhang, S., Zhang, Z., Cao, Y., Yang, D., & Wang, M.-W. (2021).  
452 Modulating effects of RAMPs on signaling profiles of the glucagon receptor  
453 family. *Acta Pharm Sin B*. doi:10.1016/j.apsb.2021.07.028
- 454 Skow, M. A., Bergmann, N. C., & Knop, F. K. (2016). Diabetes and obesity treatment  
455 based on dual incretin receptor activation: 'twincretins'. *Diabetes Obes Metab*,  
456 18(9), 847-854. doi:10.1111/dom.12685
- 457 Strange, P. G. (2008). Signaling mechanisms of GPCR ligands. *Curr Opin Drug Discov*  
458 *Devel*, 11(2), 196-202.
- 459 Wu, E. L., Cheng, X., Jo, S., Rui, H., Song, K. C., Davila-Contreras, E. M., Qi Y., Lee  
460 J., Monje-Galvan V., Venable R. M., Klauda J. B., Im, W. (2014). CHARMM-  
461 GUI Membrane Builder toward realistic biological membrane simulations. *J*  
462 *Comput Chem*, 35(27), 1997-2004. doi:10.1002/jcc.23702
- 463 Yabe, D., & Seino, Y. (2011). Two incretin hormones GLP-1 and GIP: comparison of  
464 their actions in insulin secretion and beta cell preservation. *Prog Biophys Mol*  
465 *Biol*, 107(2), 248-256. doi:10.1016/j.pbiomolbio.2011.07.010

466 Yue, J. T. Y., & Lam, T. K. T. (2019). Antiobesogenic effects of central GIPR  
467 antagonism. *J Clin Invest*, 129(9), 3532-3535. doi:10.1172/JCI130755  
468 Zhao, F., Zhang, C., Zhou, Q., Hang, K., Zou, X., Chen, Y., Wu F., Rao Q., Dai A., Yin  
469 W., Shen D.-D., Zhang Y., Xia T., Stevens R. C., Xu H. E., Yang D., Zhao L.,  
470 Wang, M.-W. (2021). Structural insights into hormone recognition by the human  
471 glucose-dependent insulintropic polypeptide receptor. *Elife*, 10, e68719.  
472 doi:10.7554/eLife.68719

### 473 **Acknowledgments**

474 We are grateful to Dr. Zhaotong Cong, Ms. Yan Chen and Mr. Chao Zhang for technical  
475 assistance. This work was partially supported by National Natural Science Foundation  
476 of China 81872915 (M.-W.W.), 82073904 (M.-W.W.), 82121005 (D.Y.), 81973373  
477 (D.Y.) and 21704064 (Q.Z.); National Science & Technology Major Project of China–  
478 Key New Drug Creation and Manufacturing Program 2018ZX09735–001 (M.-W.W.)  
479 and 2018ZX09711002–002–005 (D.Y.); National Science & Technology Major Project  
480 of China – Innovation 2030 for Brain Science and Brain-Inspired Technology  
481 2021ZD0203400 (Q.Z.); the National Key Basic Research Program of China  
482 2018YFA0507000 (M.-W.W.); Novo Nordisk-CAS Research Fund grant NNCAS-  
483 2017–1-CC (D.Y.) and SA-SIBS Scholarship Program (D.Y.).

484 **Author contributions:** D.Y. and M.-W.W. designed research; K.H., L.S., F.Z., A.D.,  
485 and X.C. performed research; K.H., L.S., Q.Z., R.C.S. and D.Y. analyzed data; and  
486 K.H., L.S., and M.-W.W. wrote the paper.

487 **Competing interests:** Authors declare that they have no competing interests.

488 **Data availability:** All data generated or analyzed during this study are included in the  
489 manuscript. Source data files have been provided for Figures 2-6.

490 **Figures**

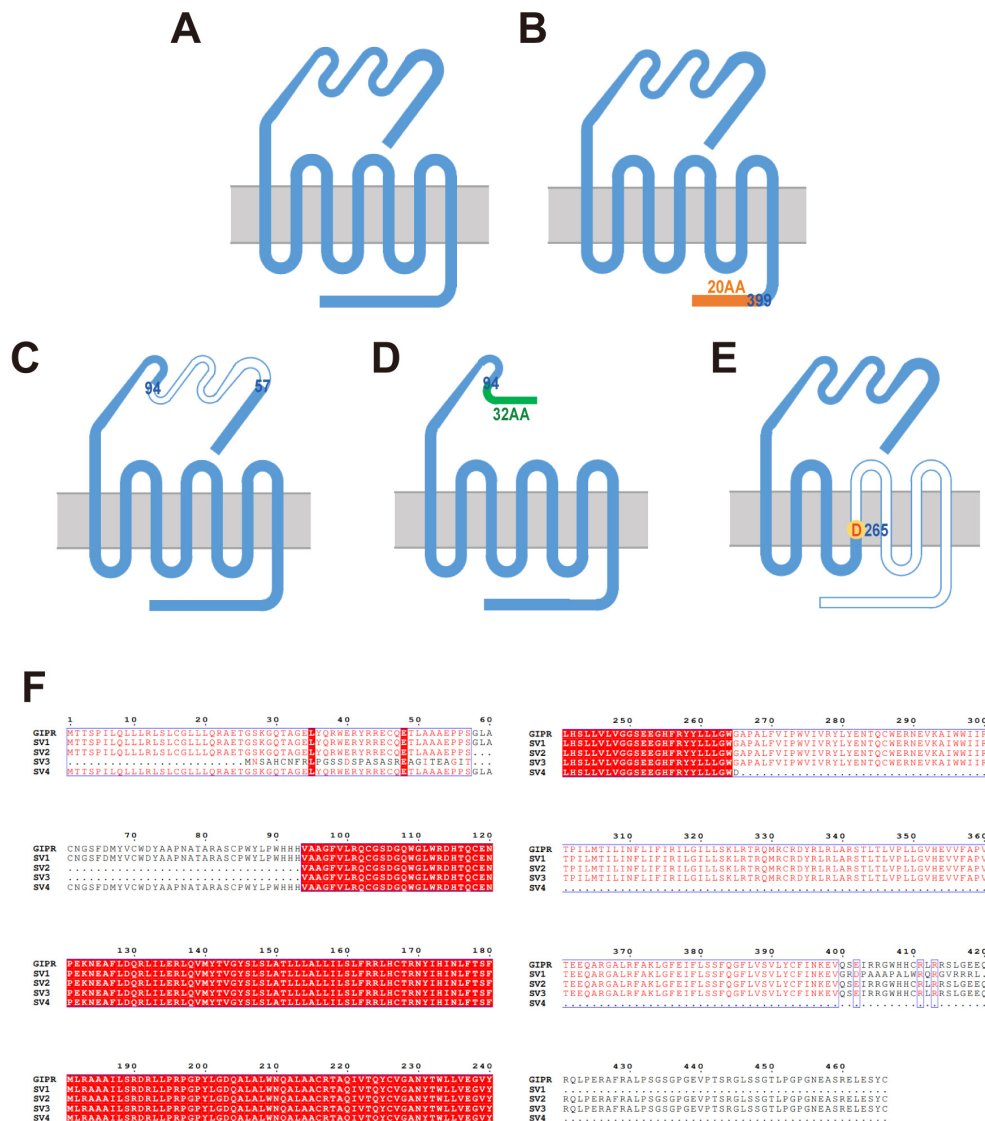

491

492 **Figure 1.** Schematic diagram of GIPR and its splice variant (SV) constructs. **A**,  
 493 Construct of the wild-type (WT) GIPR. **B**, Construct of SV1. Residues 400-466 are  
 494 replaced by a 20-amino acid sequence (GRDPAAAPALWRQRGVRRL). **C**,  
 495 Construct of SV2. Residues 58-93 are missing compared to that of WT. **D**, Construct of  
 496 SV3. Residues 1-93 are replaced by a 32-amino acid sequence  
 497 (MNSAHCNFR L PGSSDSPASASREAGITEAGIT). **E**, Construct of SV4. Residues  
 498 266-466 are missing and G265 is replaced by aspartic acid (D). **F**, Sequence alignment  
 499 of GIPR and the four SVs.

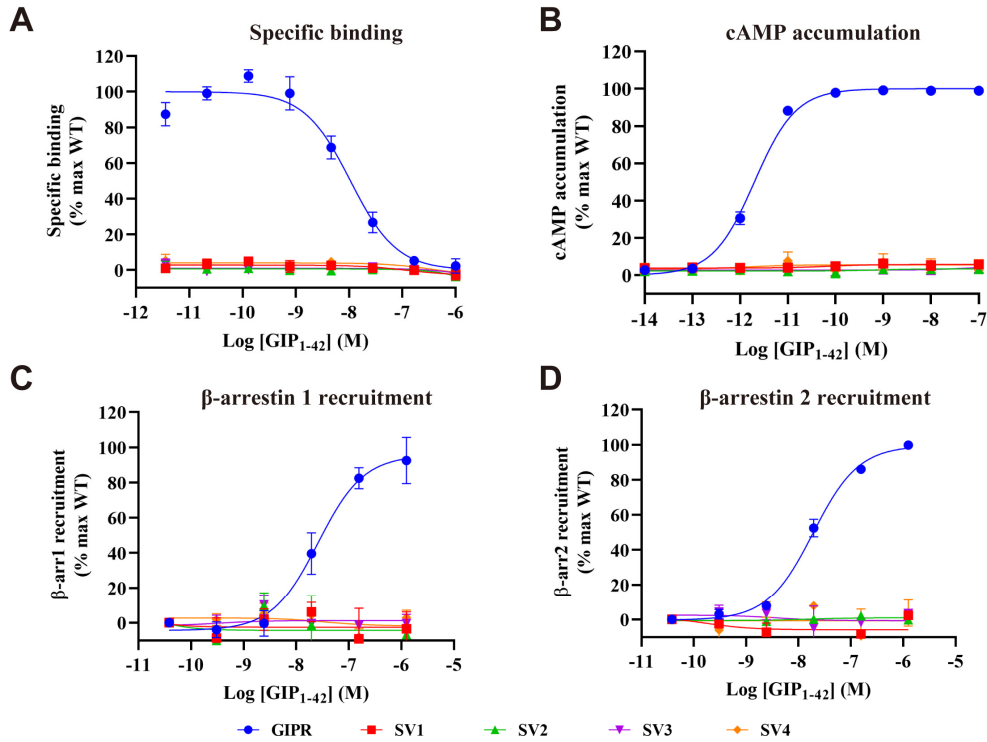

500

501 **Figure 2.** Ligand-binding and signaling profiles of GIPR and its splice variants (SVs).

502 **A,** Competitive inhibition of <sup>125</sup>I-GIP<sub>1-42</sub> binding to GIPR and SVs by unlabeled GIP<sub>1-</sub>

503 <sub>42</sub>. Binding affinity is quantified by reduction of radioactivity (counts per minute, CPM).

504 **B,** Concentration-response curves of cAMP accumulation elicited by GIP<sub>1-42</sub> at GIPR

505 and SVs. **C and D,** β-arrestins 1 (β-arr1) and 2 (β-arr2) recruitment by GIPR and SVs.

506 Concentration-response characteristics are shown as the area-under-the-curve (AUC)

507 across the time-course response curve (0 to 10 min) for each concentration. Data shown

508 are means ± SEM of at least three independent experiments (n=3-5) performed in

509 quadruplicate (cAMP accumulation) or duplicate (specific binding and β-arrestin

510 recruitment). Signals were normalized to the maximum (max) response of the wild-type

511 (WT) GIPR and concentration-response curves were analyzed using a three-parameter

512 logistic equation.

513 The following figure supplements are available for figure 2:

514 Source data 1. Ligand-binding and signaling profiles of GIPR and its splice variants

515 (SVs).

516

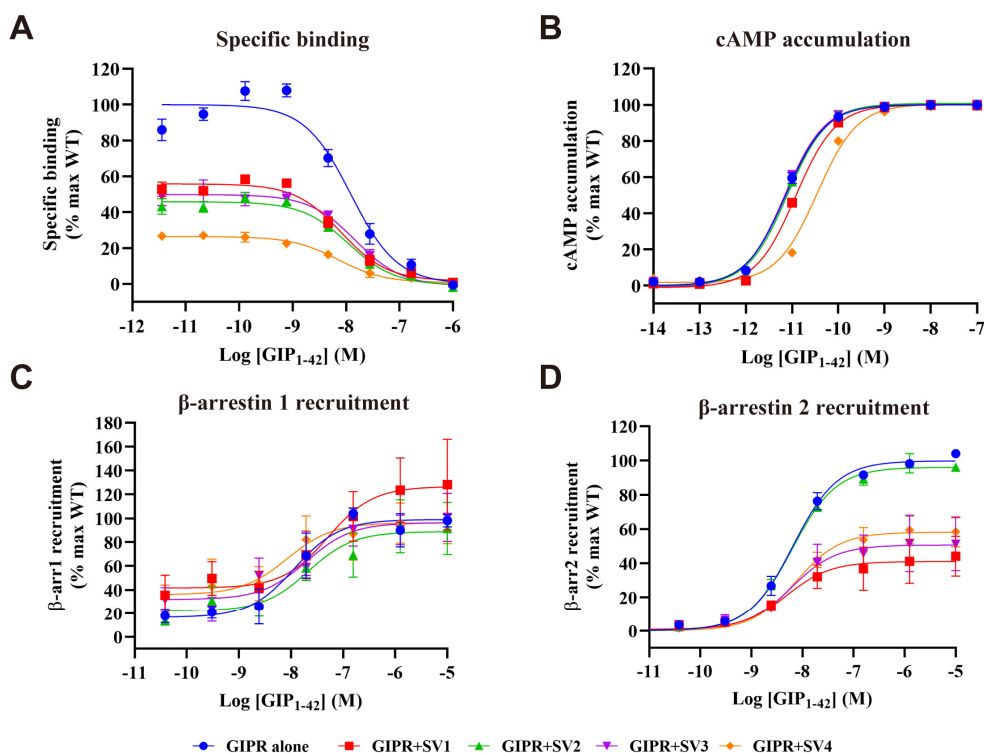

517

518 **Figure 3.** Effects of GIPR splice variants (SVs) on ligand binding and the wild-type  
519 (WT) GIPR mediated signal transduction in HEK293T cells co-expressing GIPR and  
520 individual SVs. **A**, Effects of SVs on competitive binding of <sup>125</sup>I-GIP<sub>1-42</sub> to GIPR. **B**,  
521 Effects of SVs on GIP<sub>1-42</sub> induced cAMP accumulation at GIPR. **C and D**, Effects of  
522 SVs and GIPR on beta-arrestins 1 (beta-arr1) and 2 (beta-arr2) recruitment by GIPR. Cells were  
523 co-transfected with GIPR and each SV at a 1:3 ratio. Data shown are means ± SEM of  
524 at least three independent experiments (n=3-5) performed in quadruplicate (cAMP  
525 accumulation) or duplicate (specific binding and beta-arrestin recruitment). Signals were  
526 normalized to the maximum (max) response of GIPR and concentration-response  
527 curves were analyzed using a three-parameter logistic equation.

528 The following figure supplements are available for figure 3:

529 Source data 1. Effects of GIPR splice variants (SVs) on ligand binding and the wild-  
530 type (WT) GIPR mediated signal transduction in HEK293T cells co-expressing GIPR  
531 and individual SVs.

532

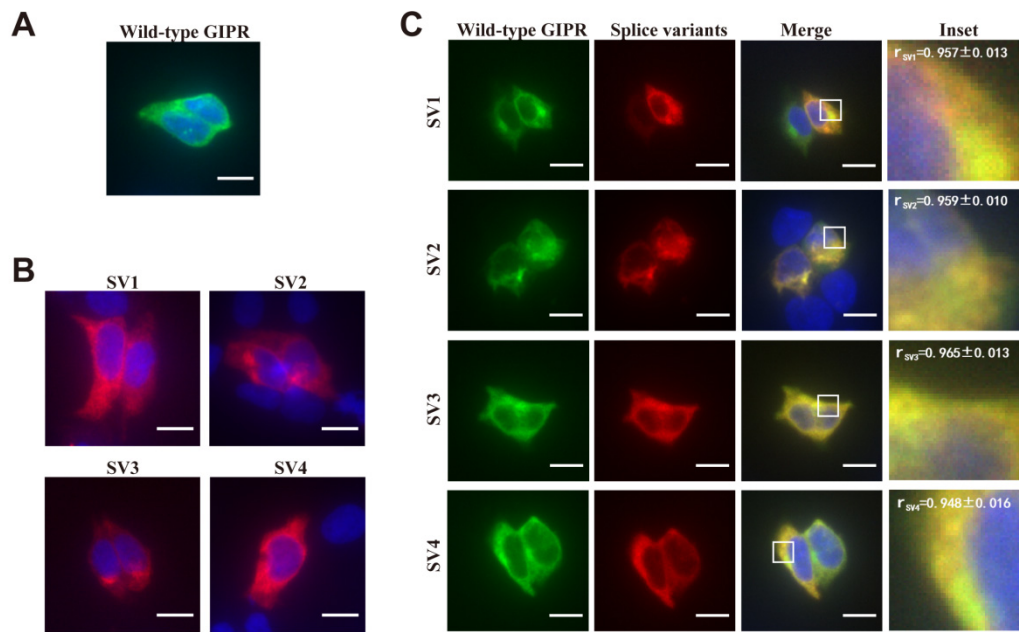

533

534 **Figure 4.** Co-localization of GIPR and its splice variants (SVs). Immunofluorescence  
535 staining of HEK293T cells transfected with GIPR-HA (A) or each SV-FLAG (B) alone.  
536 To estimate their co-localization, co-transfection of GIPR and individual SVs (C)  
537 was performed at a ratio of 1:3 (green, GIPR-HA; red, SV-FLAG; yellow, merge). Data  
538 show representative results from three independent experiments. Inset demonstrates the  
539 overlapping positions of GIPR and SVs in the cell surface (SV1, SV3 and SV4) or  
540 cytoplasm (SV2). Cells were observed by DeltaVision™ Ultra. Scale bar = 10  $\mu$ m.

541 The following figure supplements are available for figure 4:

542 Source data 1. Co-localization of GIPR and its splice variants (SVs).

543

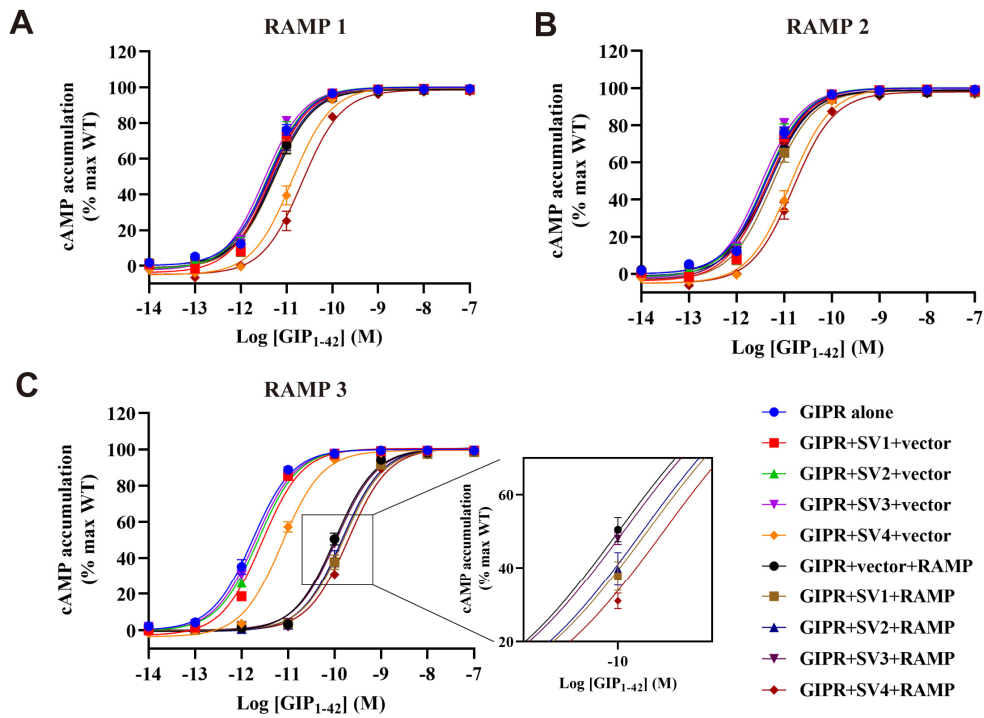

544

545 **Figure 5.** Synergistic effects of splice variants (SVs) and receptor activity-modifying  
546 proteins (RAMPs) on GIPR-mediated cAMP signaling in HEK293T cells co-  
547 expressing GIPR, each SV and RAMP1 (A), RAMP2 (B) or RAMP3 (C). Signals were  
548 normalized to the maximum (max) response of the wild-type (WT) GIPR and data were  
549 fitted with a non-linear regression of three-parameter logistic curve. Data shown are  
550 means  $\pm$  SEM of three independent experiments performed in quadruplicate.

551 The following figure supplements are available for figure 5:

552 Source data 1. Effects of splice variants (SVs) and receptor activity-modifying proteins  
553 (RAMPs) on GIPR-mediated cAMP signaling in HEK293T cells co-expressing GIPR,  
554 each SV and RAMP1.

555



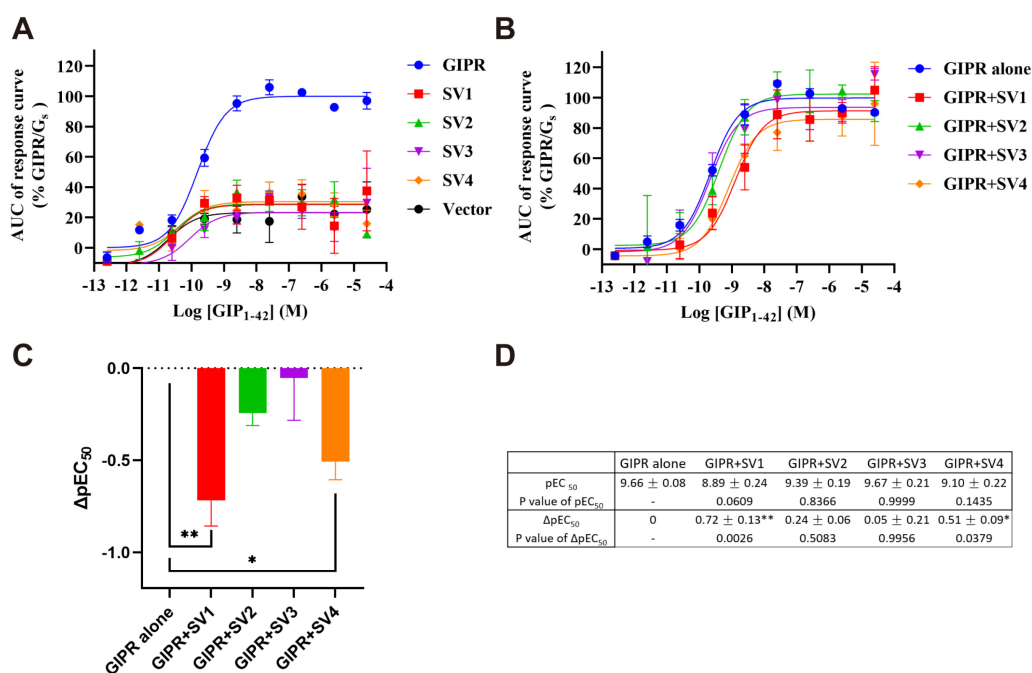

556

557 **Figure 6.** Effects of GIPR splice variants (SVs) on the wild-type (WT) GIPR mediated  
 558 G<sub>s</sub> protein coupling in HEK293T cells co-expressing GIPR and individual SVs. **A**,  
 559 GIP<sub>1-42</sub>-induced G<sub>s</sub> coupling of individually expressed SVs and GIPR. Concentration-  
 560 response curves are expressed as area-under-the-curve (AUC) across the time-course  
 561 response curve (0 to 13.5 min) for each concentration and normalized to WT GIPR. **B**,  
 562 Effects of SVs on GIP<sub>1-42</sub> induced G<sub>s</sub> protein coupling at GIPR. **C**, EC<sub>50</sub> differences of  
 563 GIPR mediated G<sub>s</sub> protein coupling under the influence of SVs. **D**, G<sub>s</sub> protein coupling  
 564 profiles of GIPR affected by SVs. Cells were co-transfected with GIPR and each SV at  
 565 a 1:3 ratio. Data shown are means ± SEM of six independent experiments performed in  
 566 duplicate. Signals were normalized to the maximum (max) response of GIPR and  
 567 concentration-response curves were analyzed using a three-parameter logistic equation.  
 568 \*P < 0.05; \*\*P < 0.01.

569 The following figure supplements are available for figure 6:

570 Source data 6. Effects of GIPR splice variants (SVs) on the wild-type (WT) GIPR  
 571 mediated G<sub>s</sub> protein coupling in HEK293T cells co-expressing GIPR and individual  
 572 SVs.

573

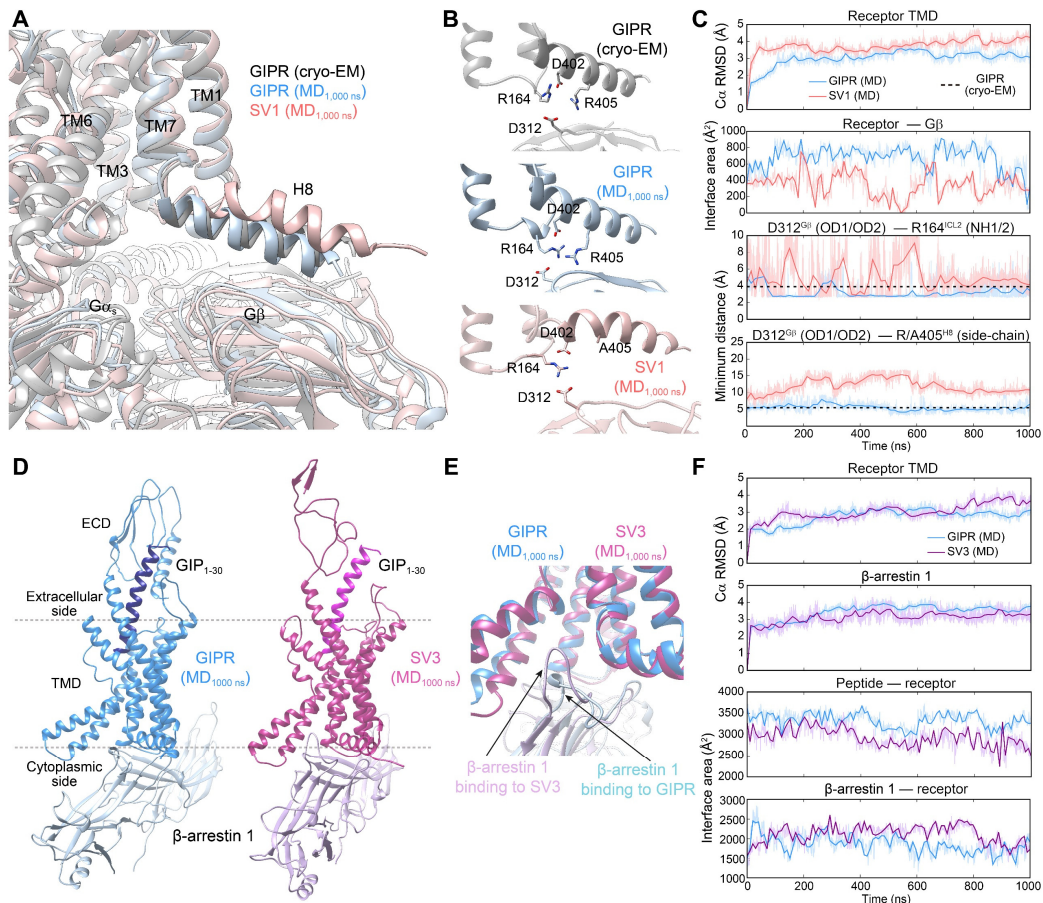

574

575 **Figure 7. Molecular dynamics (MD) simulations of SV1 and SV3. A,** Comparison  
 576 of receptor-G<sub>s</sub> conformation between the cryo-EM structure and final simulation  
 577 snapshots of SV1 and GIPR. **B,** Comparison of the H8-G<sub>β</sub> interface between GIPR and  
 578 SV1. **C,** Analysis of the MD simulation trajectories in **(A)**: top, root mean square  
 579 deviation (RMSD) of C<sub>α</sub> positions of the receptor TMD, where all snapshots were  
 580 superimposed on the cryo-EM structure of both GIP- and G<sub>s</sub>-bound GIPR TMD (PDB  
 581 code: 7DTY) using the C<sub>α</sub> atom; upper middle, the buried surface area between receptor  
 582 and G<sub>β</sub>, interface areas were calculated using freeSASA; lower middle, minimum  
 583 distances between the charged atoms of D312<sup>Gβ</sup> and R164<sup>ICL2</sup> during MD simulations;  
 584 bottom, minimum distances between the charged atoms of D312<sup>Gβ</sup> and the side-chain  
 585 atoms of R405<sup>H8</sup> (GIPR) or A405<sup>H8</sup> (SV1) during MD simulations. **D,** Comparison of  
 586 the final MD snapshots between GIPR-β-arrestin 1 and SV3-β-arrestin 1. **E,** Different  
 587 β-arrestin 1 modes between GIPR and SV3 according to MD simulations. **F,** Analysis  
 588 of the MD simulation trajectories in **(D)**: top, C<sub>α</sub> RMSD of the receptor TMD, where  
 589 all snapshots were superimposed on the cryo-EM structure of both GIP- and G<sub>s</sub>-bound  
 590 GIPR TMD (PDB code: 7DTY); upper middle, C<sub>α</sub> RMSD calculation for β-arrestin 1,  
 591 where all snapshots were superimposed on the cryo-EM structure of β<sub>1</sub>AR-bound β-  
 592 arrestin 1 (PDB code: 6TKO) using the C<sub>α</sub> atom; lower middle, the buried surface area  
 593 between receptor and peptide during MD simulations; bottom, the buried surface area  
 594 between receptor and β-arrestin 1 during MD simulations.

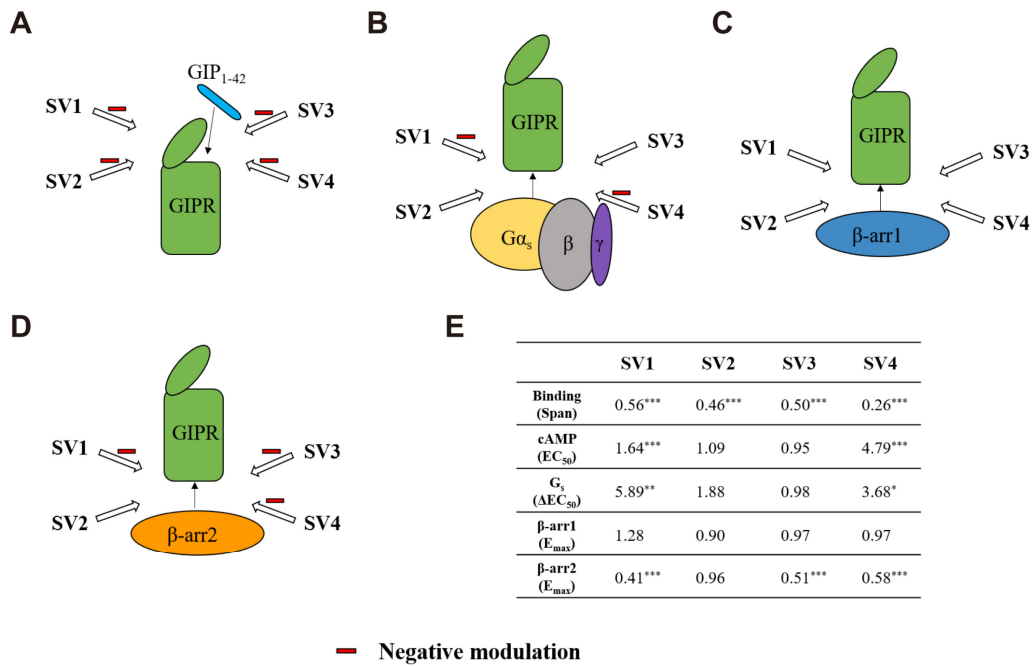

595

596 **Figure 8.** Characterization of the effects of SVs on ligand binding and signaling profiles  
 597 in HEK293T cells co-expressing GIPR and individual SVs. **A-D**, Schematic diagram  
 598 representing the effects of SVs on ligand binding (**A**), cAMP signaling and G<sub>s</sub> activation  
 599 (**B**), β-arrestins 1 (β-arr1) (**C**) and 2 (β-arr2) recruitment (**D**). **E**, Ratio of parameters of  
 600 ligand binding and signaling to GIPR alone. One-way ANOVA were used to determine  
 601 statistical difference (\*P< 0.05, \*\*P< 0.01, \*\*\*P< 0.0001).

602

603 **Table 1.** Effects of splice variants (SVs) on ligand binding and GIPR-mediated signal transduction in HEK293T cells co-expressing GIPR and  
 604 individual SVs.

|                 | Ligand binding          |                | cAMP accumulation       |                            | G <sub>s</sub> coupling |                            | β-arr1 recruitment      |                            | β-arr2 recruitment      |                            |
|-----------------|-------------------------|----------------|-------------------------|----------------------------|-------------------------|----------------------------|-------------------------|----------------------------|-------------------------|----------------------------|
|                 | pIC <sub>50</sub> ± SEM | Span (%) ± SEM | pEC <sub>50</sub> ± SEM | E <sub>max</sub> (%) ± SEM | pEC <sub>50</sub> ± SEM | E <sub>max</sub> (%) ± SEM | pEC <sub>50</sub> ± SEM | E <sub>max</sub> (%) ± SEM | pEC <sub>50</sub> ± SEM | E <sub>max</sub> (%) ± SEM |
| <b>WT GIPR</b>  | 7.91 ± 0.10             | 100.00 ± 4.87  | 11.14 ± 0.02            | 100.00 ± 0.63              | 9.66 ± 0.08             | 99.79 ± 2.20               | 7.94 ± 0.26             | 99.03 ± 6.83               | 8.19 ± 0.06             | 99.78 ± 1.81               |
| <b>GIPR+SV1</b> | 8.09 ± 0.09             | 54.21 ± 2.27*  | 10.92 ± 0.02*           | 100.08 ± 0.50              | 8.89 ± 0.24             | 91.36 ± 6.42               | 7.29 ± 0.52             | 126.65 ± 16.04             | 8.32 ± 0.35*            | 40.99 ± 4.17               |
| <b>GIPR+SV2</b> | 7.96 ± 0.11             | 46.52 ± 2.30*  | 11.10 ± 0.02            | 100.79 ± 0.52              | 9.39 ± 0.19             | 102.39 ± 5.10              | 7.67 ± 0.44             | 88.87 ± 9.90               | 8.21 ± 0.06             | 96.02 ± 1.69               |
| <b>GIPR+SV3</b> | 7.82 ± 0.13             | 51.01 ± 3.26*  | 11.16 ± 0.02            | 100.38 ± 0.43              | 9.67 ± 0.21             | 93.61 ± 5.31               | 7.70 ± 0.39             | 96.31 ± 8.45               | 8.22 ± 0.34*            | 50.62 ± 5.12               |
| <b>GIPR+SV4</b> | 8.15 ± 0.13             | 25.77 ± 1.59*  | 10.46 ± 0.02*           | 100.38 ± 0.68              | 9.10 ± 0.22             | 85.77 ± 5.40               | 8.08 ± 0.60             | 96.27 ± 10.78              | 8.13 ± 0.16*            | 58.17 ± 2.88               |

605 cAMP accumulation, G<sub>s</sub> activation and β-arrestin 1/2 recruitment assays were performed in HEK293T cells. Whole cell binding assay was  
 606 performed in CHO-K1 cells. All the measures were fitted to non-linear regression three-parameter logistic curves. pEC<sub>50</sub> and pIC<sub>50</sub> are the negative  
 607 logarithm of the concentration of an agonist that gives a half of the maximum response. E<sub>max</sub> and span values are the percentage (%) of the  
 608 maximum response in cells expressing GIPR only. Data shown are means ± SEM of at least three independent experiments. One-way ANOVA  
 609 was used to determine statistical difference (\*P < 0.0001). β-arr1, β-arrestin 1; β-arr2, β-arrestin 2; WT, wild-type.

610

611 **Table 2.** Synergistic effects of splice variants (SVs) and receptor activity-modifying  
 612 proteins (RAMPs) on GIPR-mediated cAMP signaling in HEK293T cells co-  
 613 expressing GIPR.

|                   | cAMP accumulation         |                            |                           |                            |                           |                            |
|-------------------|---------------------------|----------------------------|---------------------------|----------------------------|---------------------------|----------------------------|
|                   | RAMP1                     |                            | RAMP2                     |                            | RAMP3                     |                            |
|                   | pEC <sub>50</sub> ± SEM   | E <sub>max</sub> (%) ± SEM | pEC <sub>50</sub> ± SEM   | E <sub>max</sub> (%) ± SEM | pEC <sub>50</sub> ± SEM   | E <sub>max</sub> (%) ± SEM |
| <b>GIPR</b>       | 11.39 ± 0.03              | 100.00 ± 0.88              | 11.39 ± 0.03              | 100.00 ± 0.88              | 11.76 ± 0.03              | 100.00 ± 0.78              |
| <b>SV1</b>        | 11.36 ± 0.04              | 100.00 ± 0.96              | 11.36 ± 0.04              | 100.00 ± 0.96              | 11.56 ± 0.03 <sup>b</sup> | 100.47 ± 0.67              |
| <b>SV2</b>        | 11.42 ± 0.04              | 100.17 ± 1.11              | 11.42 ± 0.04              | 100.17 ± 1.11              | 11.64 ± 0.03 <sup>a</sup> | 100.40 ± 0.73              |
| <b>SV3</b>        | 11.48 ± 0.04              | 99.89 ± 0.89               | 11.48 ± 0.04              | 99.89 ± 0.89               | 11.70 ± 0.03              | 100.08 ± 0.62              |
| <b>SV4</b>        | 10.89 ± 0.04 <sup>b</sup> | 100.15 ± 1.18              | 10.89 ± 0.04 <sup>b</sup> | 100.15 ± 1.18              | 11.13 ± 0.03 <sup>b</sup> | 99.48 ± 0.67               |
| <b>GIPR alone</b> | 11.27 ± 0.04              | 98.71 ± 1.09               | 11.34 ± 0.04              | 98.64 ± 1.00               | 10.00 ± 0.03              | 100.45 ± 0.94              |
| <b>GIPR+SV1</b>   | 11.27 ± 0.04              | 99.11 ± 1.04               | 11.26 ± 0.04              | 98.61 ± 1.17               | 9.81 ± 0.03 <sup>d</sup>  | 100.40 ± 1.12              |
| <b>GIPR+SV2</b>   | 11.31 ± 0.05              | 99.06 ± 1.28               | 11.31 ± 0.04              | 99.01 ± 1.09               | 9.84 ± 0.03 <sup>c</sup>  | 100.83 ± 1.25              |
| <b>GIPR+SV3</b>   | 11.38 ± 0.04              | 99.07 ± 0.98               | 11.42 ± 0.04              | 98.72 ± 0.93               | 9.96 ± 0.03               | 100.32 ± 0.84              |
| <b>GIPR+SV4</b>   | 10.66 ± 0.04 <sup>e</sup> | 98.54 ± 1.27               | 10.81 ± 0.04 <sup>c</sup> | 97.94 ± 1.12               | 9.70 ± 0.02 <sup>e</sup>  | 100.72 ± 0.82              |

614 cAMP accumulation was performed in HEK293T cells. Dose-response curves were  
 615 analyzed using a three-parameter logistic equation to obtain pEC<sub>50</sub> and E<sub>max</sub>. Data  
 616 shown are means ± SEM of at least three independent experiments. One-way ANOVA  
 617 was used to determine statistical difference. <sup>a</sup>, P < 0.05, <sup>b</sup>, P < 0.0001 compared with  
 618 GIPR. <sup>c</sup>, P < 0.01, <sup>d</sup>, P < 0.001 and <sup>e</sup>, P < 0.0001 compared with GIPR alone.
